3. Larson CP Jr, Eger EI II, Muallem M, *et al.*: The effects of diethyl ether and methoxyflurane on ventilation: II. A comparative study in man. *ANESTHESIOLOGY* 30:174-184, 1969
4. Ngai SH, Bolme P: Effects of anesthetics on circulatory regulatory mechanisms in the dog. *J Pharmacol Exp Ther* 153:495-504, 1966
5. Scott DB, Slawson KB, Taylor SH: The circulatory effects of the Valsalva maneuver during anaesthesia and thoracotomy. *Cardiovasc Res* 3:331-337, 1969
6. Andersen HT: Physiological adaptations in diving vertebrates. *Physiol Rev* 46:212-243, 1966
7. Wayne TF, Killip T III: Simulated diving in man: Comparison of facial stimuli and response in arrhythmia. *J Appl Physiol* 22: 800-807, 1967
8. Elsner R, Franklin DL, Van Citters RL, *et al.*: Cardiovascular defense against asphyxia. *Science* 153:941-949, 1966
9. Sharpey-Schafer EP: Effect of respiratory acts on the circulation, *Handbook of Physiology*. Circulation. Washington, D. C., American Physiology Society, 1965, sect 2, vol 3, chapt 52, pp 1875-1886
10. Price HL, King BD, Elder JD, *et al.*: Circulatory effects of raised airway pressure during cyclopropane anesthesia in man. *J Clin Invest* 30:1243-1249, 1951
11. Cunningham DM, Smiley PC: A hydrostatic air-breathing ballistocardiograph. *J Appl Physiol* 16:755-759, 1961
12. Smith NT, Eger EI II, Stoelting RK, *et al.*: Cardiovascular effects of halothane in man. *JAMA* 206:1495-1499, 1968
13. Saidman LJ, Eger EI II: Effects of nitrous oxide and of narcotic premedication on the alveolar concentration of halothane required for anesthesia. *ANESTHESIOLOGY* 25:302-306, 1964
14. Gregory GA, Eger EI II, Munson ES: The relationship between age and halothane requirement in man. *ANESTHESIOLOGY* 30: 488-491, 1969
15. Scholander PF: Physiological adaptations to diving in animals and man. *Harvey Lectures* 57:93-110, 1961-62

## Pediatrics

**PULMONARY FUNCTION IN CYSTIC FIBROSIS** Eighteen children (mean age 8 years) with cystic fibrosis underwent studies of pulmonary diffusing capacity by the carbon monoxide method at rest, sitting, head down, and after exercise to exhaustion. In contrast to eight normal children of comparable ages, none of the children with cystic fibrosis were able to increase their diffusion rates for carbon monoxide in the head-down position or during severe exercise. Lung volumes, mechanics of breathing and gas mixing were normal in half of the children with cystic fibrosis. The inability of the child with cystic fibrosis to increase the diffusion rate with exercise or gravity represents a profound loss of adaptability, and may be responsible for the poor exercise tolerance, dyspnea, and cyanosis observed in these children during physical activity. Further studies will be necessary to determine whether the limitation of diffusion capacity results from loss of membrane surface area or from abnormalities in the pulmonary capillary bed. (*Zelkowitz, P. S., and Giammona, S. T.: Effects of Gravity and Exercise on the Pulmonary Diffusing Capacity in Children with Cystic Fibrosis, J. Pediat.* 74: 393 (March) 1969.)

## Surgery

**GOODPASTURE'S SYNDROME** Resolution of the pulmonary changes in Goodpasture's syndrome may occur after bilateral nephrectomy. Hemorrhages disappeared, infiltrates resolved, and arterial  $P_{O_2}$  increased from 51 to 90 torr in a group of patients in whom this operation was performed. (*Siegel, R. R.: The Basis of Pulmonary Disease Resolution after Nephrectomy in Goodpasture's Syndrome, Amer. J. Med. Sci.* 259: 202 (March) 1970.)
